# Supplementary material
Source: publisher figshare collection journal article supplement (https://tandf.figshare.com/articles/dataset/_/24160290)
Supplement: Supplementary file 1 [file 1]

# Ramachandran Plot

## c691

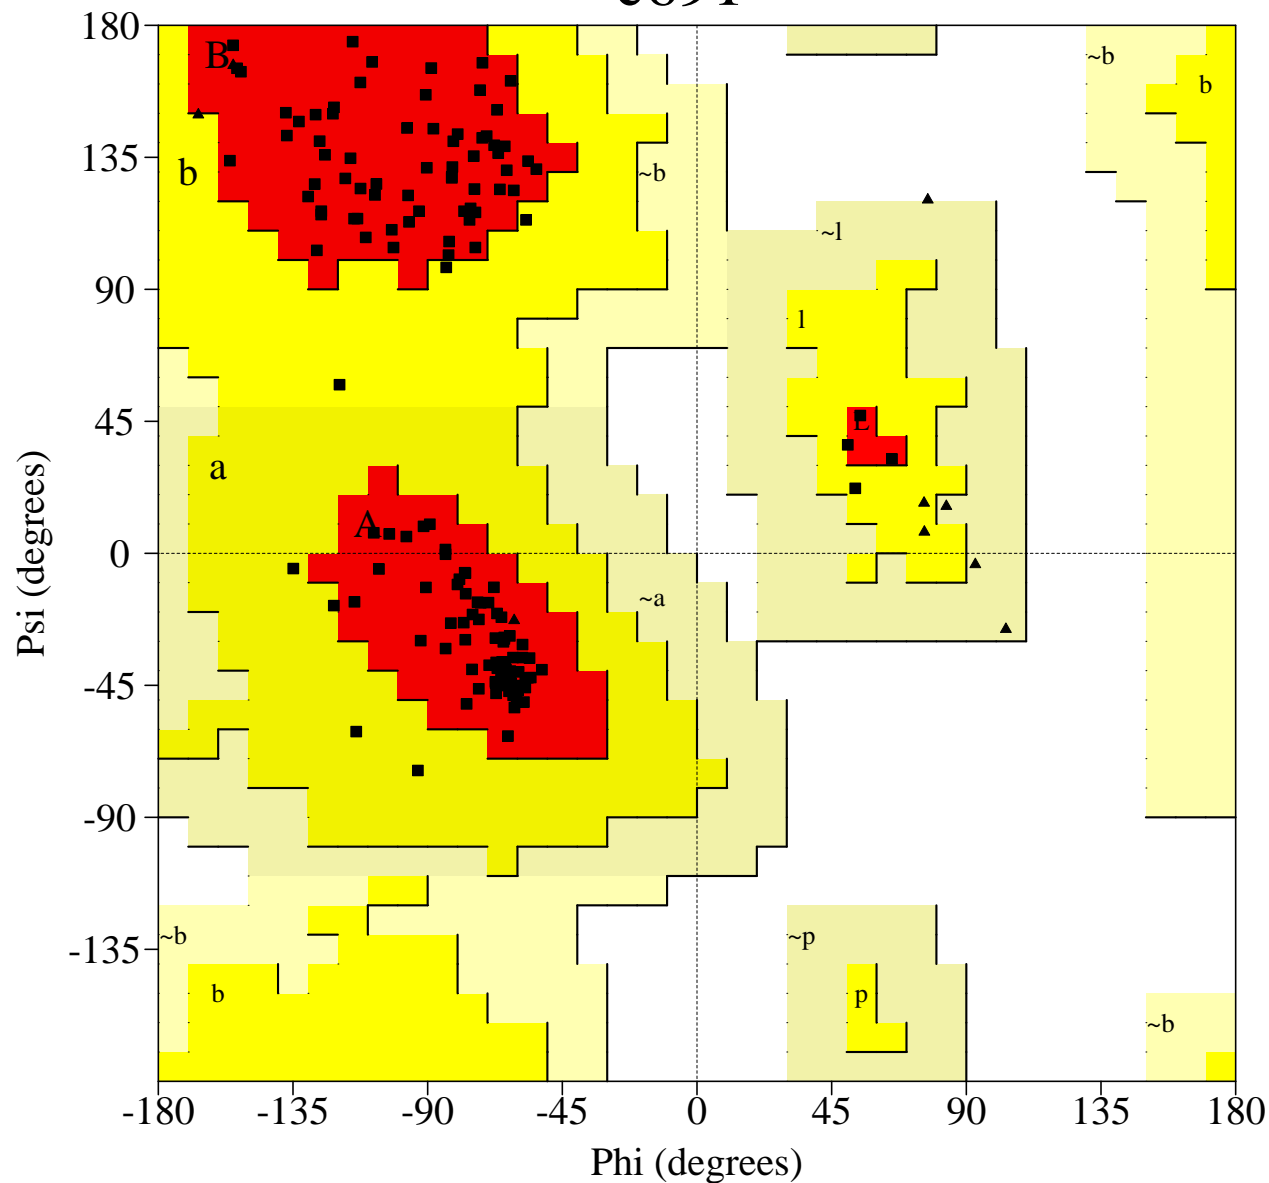

### Plot statistics

|                                                      |     |        |
|------------------------------------------------------|-----|--------|
| Residues in most favoured regions [A,B,L]            | 148 | 94.9%  |
| Residues in additional allowed regions [a,b,l,p]     | 8   | 5.1%   |
| Residues in generously allowed regions [~a,~b,~l,~p] | 0   | 0.0%   |
| Residues in disallowed regions                       | 0   | 0.0%   |
| ----                                                 |     |        |
| Number of non-glycine and non-proline residues       | 156 | 100.0% |
| Number of end-residues (excl. Gly and Pro)           | 2   |        |
| Number of glycine residues (shown as triangles)      | 10  |        |
| Number of proline residues                           | 5   |        |
| ----                                                 |     |        |
| Total number of residues                             | 173 |        |

Based on an analysis of 118 structures of resolution of at least 2.0 Angstroms and R-factor no greater than 20%, a good quality model would be expected to have over 90% in the most favoured regions.
